# Supplementary material
Source: PubMed Central journal article supplement (PMC6279538)
Supplement: NIHMS1504453-supplement-7.pdf [file NIHMS1504453-supplement-7.pdf]

**Supplementary Table 1: Number of mismatches at HLA loci**

| HLA Locus | Living donor transplants<br>(n=43 of 47) |           |           |          | Deceased donor transplants<br>(n = 102 of 110) |           |           |           |
|-----------|------------------------------------------|-----------|-----------|----------|------------------------------------------------|-----------|-----------|-----------|
|           | N*                                       | 0         | 1         | 2        | N*                                             | 0         | 1         | 2         |
| HLA-A     | 36                                       | 8 (22.2)  | 22 (61.1) | 6 (16.7) | 82                                             | 5 (6.1)   | 37 (45.1) | 40 (48.8) |
| HLA-B     | 37                                       | 2 (5.4)   | 28 (75.7) | 7 (18.9) | 84                                             | 3 (3.6)   | 14 (16.7) | 67 (79.8) |
| HLA-C     | 36                                       | 5 (13.9)  | 27 (75.0) | 4 (11.1) | 57                                             | 6 (10.5)  | 25 (43.9) | 26 (45.6) |
| HLA-DRB1  | 43                                       | 4 (9.3)   | 37 (86.0) | 2 (4.6)  | 101                                            | 4 (4.0)   | 44 (43.6) | 53 (52.5) |
| HLA-DQA1  | 41                                       | 20 (48.8) | 21 (51.2) | 0        | 1                                              | 0         | 1 (100.0) | 0         |
| HLA-DQB1  | 43                                       | 12 (27.9) | 28 (65.1) | 3 (7.0)  | 90                                             | 21 (23.3) | 52 (57.8) | 17 (18.9) |

\*N (%): available donor/recipient HLA typing to determine mismatch
