# Supplementary material
Source: PubMed Central journal article supplement (PMC6279538)
Supplement: NIHMS1504453-supplement-8.pdf [file NIHMS1504453-supplement-8.pdf]

**Supplementary Table 2: P values for associations between histological features and C4d scores\***

| Histological Features |             | Portal C4d Scores |           |             | Sinusoidal C4d Score | Perivenular C4d Scores |              | Total C4d Score |
|-----------------------|-------------|-------------------|-----------|-------------|----------------------|------------------------|--------------|-----------------|
|                       |             | Vein              | Capillary | Stroma      |                      | Vein                   | Stroma       |                 |
| <b>Inflammation</b>   | Portal      | 0.74              | 0.16      | <b>0.03</b> | 0.36                 | 0.08                   | 0.09         | 0.16            |
|                       | Perivenular | 0.80              | 0.36      | 0.51        | > 0.99               | 0.11                   | <b>0.009</b> | 0.15            |
| <b>Fibrosis</b>       | Portal      | 0.89              | 0.13      | 0.39        | 0.89                 | 0.96                   | 0.87         | 0.95            |
|                       | Disse       | 0.92              | 0.23      | 0.53        | 0.39                 | 0.56                   | 0.64         | 0.33            |
|                       | Perivenular | 0.27              | 0.06      | 0.71        | 0.53                 | 0.58                   | 0.38         | 0.47            |

\*P values from Fisher's exact tests are shown except for those in the Total C4d Score column which are from Chi-squared tests.
