# Supplementary material
Source: PubMed Central journal article supplement (PMC6279538)
Supplement: NIHMS1504453-supplement-9.pdf [file NIHMS1504453-supplement-9.pdf]

**Supplementary Table 3A: Associations between clinical characteristics and autoantibody profiles<sup>#</sup>**

| Characteristic                              |             | ANA                 |                     | ASMA               |                    | α-AT1R              |                     | α-ETAR              |                     |
|---------------------------------------------|-------------|---------------------|---------------------|--------------------|--------------------|---------------------|---------------------|---------------------|---------------------|
|                                             |             | ≥1:40               | Negative            | 1:80               | NEGATIVE           | >17 U/mL            | ≤17 U/mL            | >17 U/mL            | ≤17 U/mL            |
| Age (years)                                 | Transplant  | 2.1 (1.69)          | 1.8 (1.73)          | <b>3.5 (2.64)*</b> | <b>1.8 (1.65)*</b> | 1.8 (1.67)          | 1.7 (1.74)          | 1.8 (1.63)          | 1.9 (1.80)          |
|                                             | Study entry | <b>12.6 (3.00)^</b> | <b>10.4 (3.39)^</b> | 11.7 (5.55)        | 10.9 (3.34)        | <b>10.2 (3.43)*</b> | <b>11.6 (2.99)*</b> | <b>10.2 (3.44)*</b> | <b>11.6 (2.97)*</b> |
| Interval: transplant to study entry (years) |             | <b>10.5 (3.34)^</b> | <b>8.6 (3.22)^</b>  | 8.1 (3.13)         | 9.0 (3.36)         | <b>8.4 (3.31)*</b>  | <b>9.9 (3.18)*</b>  | <b>8.4 (3.40)*</b>  | <b>9.7 (3.06)*</b>  |
| Living donor                                |             | 9 (26.5)            | 31 (31.3)           | 2 (40.0)           | 38 (29.7)          | 22 (27.2)           | 12 (31.6)           | 21 (26.6)           | 13 (32.5)           |
| History of previous rejection               |             | 15 (44.1)           | 36 (36.4)           | 1 (20.0)           | 50 (39.1)          | 33 (40.7)           | 11 (28.9)           | 33 (41.8)           | 11 (27.5)           |
| ALT (U/L)                                   |             | 31.7 (26.60)        | 26.9 (8.82)         | 21.8 (5.05)        | 28.4 (15.68)       | <b>29.0 (8.87)*</b> | <b>25.0 (7.57)*</b> | <b>28.9 (7.90)*</b> | <b>25.3 (9.61)*</b> |
| GGT (U/L)                                   |             | 17.1 (6.39)         | 17.4 (8.18)         | 14.6 (3.61)        | 17.5 (7.85)        | 17.7 (8.21)         | 16.5 (7.03)         | 17.9 (8.33)         | 16.1 (6.72)         |

<sup>#</sup>ANA and ASMA data was available for **133** subjects. α-AT1R and α-ETAR data was available for **119** subjects. Continuous variables are summarized using mean and standard deviation (SD); Categorical variables are summarized by counts (percentages). Variables with significant differences between subgroups are highlighted in bold. \*p < 0.05, ^p < 0.01.

**Supplementary Table 3B: Associations between clinical characteristics and DSA profiles<sup>#</sup>**

| Characteristic                              |             | Class II DSA |             | Maximum class II DSA MFI |              | Sum of class II DSA MFIs |             |
|---------------------------------------------|-------------|--------------|-------------|--------------------------|--------------|--------------------------|-------------|
|                                             |             | Positive     | Negative    | ≤ 20,000                 | > 20,000     | ≤ 20,000                 | > 20,000    |
| Age (years)                                 | Transplant  | 1.9 (1.65)   | 1.9 (1.89)  | 2.0 (1.83)               | 1.90 (1.44)  | 1.9 (1.85)               | 2.0 (1.50)  |
|                                             | Study entry | 11.3 (3.32)  | 10.4 (3.65) | 11.6 (3.07)              | 10.9 (3.58)  | 11.8 (2.97)              | 10.9 (3.55) |
| Interval: transplant to study entry (years) |             | 9.4 (3.40)   | 8.5 (3.48)  | 9.6 (3.16)               | 9.0 (3.66)   | 9.8 (3.04)               | 8.9 (3.63)  |
| Living donor                                |             | 26 (32.5)    | 17 (26.6)   | 15 (34.9)                | 11 (29.7)    | 11 (31.4)                | 15 (33.3)   |
| History of previous rejection               |             | 33 (41.2)    | 22 (34.4)   | 14 (32.6)                | 19 (51.3)    | 11 (31.4)                | 22 (48.9)   |
| ALT (U/L)                                   |             | 26.3 (9.24)  | 27.4 (7.74) | 25.4 (7.88)              | 27.3 (10.62) | 26.0 (8.33)              | 26.6 (9.97) |
| GGT (U/L)                                   |             | 17.9 (7.44)  | 16.0 (7.35) | 17.6 (7.32)              | 18.4 (7.65)  | 17.1 (6.86)              | 18.6 (7.87) |

<sup>#</sup> Class II DSA data was available for 144 subjects. There were no significant differences between subgroups.
