# Supplementary material
Source: PubMed Central journal article supplement (PMC6279538)
Supplement: NIHMS1504453-supplement-10.pdf [file NIHMS1504453-supplement-10.pdf]

**Supplementary Table 4:** Associations between serological profile and histological features and C4d scores\*

| Serological Profile       | Histological Features |                     |                      | Compartment and Total C4d Scores |                     |                         |
|---------------------------|-----------------------|---------------------|----------------------|----------------------------------|---------------------|-------------------------|
|                           | Ishak Fibrosis Stage  | Portal Inflammation | Lobular Inflammation | Portal Capillary                 | Sinusoidal          | Total                   |
| IgG (mg/dL)               | 1.00 (0.10)           | 1.00 (0.28)         | 1.00 (0.13)          | 1.00 (0.06)                      | 1.00 (0.79)         | 1.00 (0.07)             |
| <b>ANA ≥1:40</b>          | 2.35 (0.06)           | 1.72 (0.26)         | <b>3.27 (0.046)</b>  | 2.34 (0.06)                      | 1.51 (0.42)         | 1.68 (0.21)             |
| <b>ASMA = 1:80</b>        | 3.94 (0.18)           | 0.19 (0.18)         | 1.05 (0.97)          | 0.96 (0.97)                      | 4.51 (0.13)         | 0.80 (0.80)             |
| <b>α-AT1R (U/mL)</b>      | 1.05 (0.09)           | 1.02 (0.63)         | 1.05 (0.17)          | 0.97 (0.41)                      | 0.94 (0.14)         | 0.95 (0.08)             |
| <b>α-ETAR (U/mL)</b>      | 0.97 (0.40)           | 0.99 (0.89)         | 0.98 (0.59)          | 1.05 (0.15)                      | 1.06 (0.16)         | <b>1.07 (0.02)</b>      |
| <b>MFI sum ≤20,000</b>    | 1.68 (0.28)           | 1.81 (0.25)         | 1.28 (0.71)          | 1.05 (0.92)                      | <b>3.25 (0.04)</b>  | 1.25 (0.61)             |
| <b>MFI sum &gt;20,000</b> | <b>4.53 (0.001)</b>   | <b>3.59 (0.01)</b>  | 1.00 (0.99)          | <b>5.11 (&lt;0.001)</b>          | <b>4.40 (0.007)</b> | <b>4.73 (&lt;0.001)</b> |

\*Shown are odds ratios (p-values) from the models of the individual features. Overall model p-values are not shown.
