# Supplementary material
Source: PubMed Central journal article supplement (PMC6279538)
Supplement: NIHMS1504453-supplement-11.pdf [file NIHMS1504453-supplement-11.pdf]

**Supplementary Table 5:** 194 genes comprising the “salmon” co-expressed gene module

| Gene Symbol |          |          |          |
|-------------|----------|----------|----------|
| RASGRP1     | PTPN22   | LCK      | CCL18    |
| DHRS9       | STAP1    | ARHGAP4  | CCL19    |
| KLRG1       | GATA3    | RHOH     | CCL21    |
| CD96        | LAMP3    | LSP1     | CXCL11   |
| IKZF1       | SIT1     | LTB      | MICAL1   |
| CD52        | STK39    | LY9      | BCL11B   |
| UBD         | GP1BA    | LYZ      | SSTR1    |
| BATF        | CLEC9A   | MDK      | STAT5A   |
| CXCL13      | C16orf54 | CXCL9    | TNF      |
| CXCR6       | GPR18    | MMP9     | TNFAIP3  |
| HCP5        | IGHV1-69 | NELL2    | CCR2     |
| HCST        | TRDC     | NKG7     | CXCR4    |
| BTN3A1      | FAM78A   | P2RX5    | PVRIG    |
| CORO1A      | TRBC2    | DEF6     | EPS8L3   |
| MAP4K1      | TRAC     | TRAT1    | TRAF3IP3 |
| SLAMF6      | IGLV3-19 | PLEKHO1  | TLR10    |
| FCRL3       | CLEC2D   | MZB1     | CAPG     |
| AMICA1      | GPR171   | PIK3CG   | EOMES    |
| CCR7        | MDFIC    | UBASH3A  | SH3BGRL3 |
| CR2         | GZMH     | PLXNA1   | RHNO1    |
| CSF2RA      | TBX21    | SASH3    | FGFBP2   |
| C17orf50    | GZMA     | RHOF     | TAGLN2   |
| PYHIN1      | GZMB     | POU2AF1  | DGKZ     |
| BTLA        | GZMK     | LAX1     | CST7     |
| GLIPR2      | GZMM     | CCDC109B | RUNX2    |
| CX3CR1      | H2AFX    | BANK1    | RUNX3    |
| SAMD3       | HLA-A    | CEP55    | PAPLN    |
| DGKA        | HLA-DOA  | SIRPG    | CD1C     |
| SEPT1       | HLA-DOB  | CHST12   | CD1E     |
| DUSP2       | HLA-DPB1 | PRF1     | CD2      |
| GPR183      | IGHA1    | PRKCD    | CD3D     |
| EGR2        | IGHM     | PCDHGB6  | CD3E     |
| EMP3        | IGJ      | CRTAM    | CD3G     |
| TIGIT       | IGKC     | PSMB8    | CD247    |
| GAPT        | IL3RA    | PSMB9    | FAIM3    |
| EVI2A       | IL7R     | ASPHD2   | CD5      |
| RASGEF1A    | IDO1     | SLAMF7   | CD8A     |
| FLT3        | CXCL10   | PTPRCAP  | STK17B   |
| COTL1       | ITK      | PTPRE    | CD83     |
| HMHA1       | KCNA3    | RAG1     | MS4A1    |
| FZD2        | TBC1D10C | RALGDS   | CD27     |
| EHBP1L1     | KLRB1    | RGS10    | CHST2    |
| MCOLN2      | KLRC3    | RNASE6   | IL27RA   |
| GCSAM       | KLRD1    | APOBEC3G | CD44     |
| CLIP3       | THEMIS   | TNFRSF17 | CD48     |
| FDCSP       | CEACAM16 | S100A4   | CD69     |
| TES         | RHOG     | CCL2     | CD74     |
|             |          | CCL4     | ACAP1    |
|             |          | CCL5     | SPOCK2   |
|             |          | CCL8     | TESPA1   |
