# Supplementary material
Source: PubMed Central journal article supplement (PMC6279538)
Supplement: NIHMS1504453-supplement-12.pdf [file NIHMS1504453-supplement-12.pdf]

**Supplementary Table 6A: Liver tissue differential gene expression (Nanostring platform)**

| <b>Cluster 1 versus 2</b> |                                                            |                    |                |                |
|---------------------------|------------------------------------------------------------|--------------------|----------------|----------------|
| <b>Gene Symbol</b>        | <b>Gene Name</b>                                           | <b>Fold Change</b> | <b>P-value</b> | <b>Q-value</b> |
| <b>MMP9</b>               | matrix metalloproteinase 9                                 | 3.40               | 9.38E-07       | 3.74E-04       |
| <b>CTLA4</b>              | cytotoxic T-lymphocyte associated protein 4                | 3.26               | 3.76E-07       | 3.00E-04       |
| <b>CDK1</b>               | cyclin dependent kinase 1                                  | 2.83               | 1.04E-04       | 9.22E-03       |
| <b>CCL18</b>              | C-C motif chemokine ligand 18                              | 2.75               | 2.93E-04       | 1.80E-02       |
| <b>CCL19</b>              | C-C motif chemokine ligand 19                              | 2.60               | 8.68E-05       | 9.22E-03       |
| <b>CXCL9</b>              | C-X-C motif chemokine ligand 9                             | 2.39               | 7.45E-05       | 9.22E-03       |
| <b>CD1E</b>               | CD1e molecule                                              | 2.30               | 1.80E-04       | 1.30E-02       |
| <b>BIRC5</b>              | baculoviral IAP repeat containing 5                        | 2.25               | 2.18E-03       | 6.67E-02       |
| <b>CD27</b>               | CD27 molecule                                              | 2.25               | 1.04E-04       | 9.22E-03       |
| <b>MS4A1</b>              | membrane spanning 4-domains A1                             | 2.09               | 2.96E-03       | 7.87E-02       |
| <b>PBK</b>                | PDZ binding kinase                                         | 2.03               | 1.20E-03       | 4.33E-02       |
| <b>IL2RA</b>              | interleukin 2 receptor subunit alpha                       | 2.01               | 7.50E-03       | 1.15E-01       |
| <b>ICOS</b>               | inducible T-cell costimulator                              | 2.01               | 9.28E-05       | 9.22E-03       |
| <b>CD37</b>               | CD37 molecule                                              | 2.00               | 1.45E-03       | 4.90E-02       |
| <b>CD28</b>               | CD28 molecule                                              | 1.98               | 2.42E-06       | 6.42E-04       |
| <b>SPN</b>                | sialophorin                                                | 1.96               | 6.79E-03       | 1.12E-01       |
| <b>CD200</b>              | CD200 molecule                                             | 1.94               | 3.70E-03       | 8.76E-02       |
| <b>CD3G</b>               | CD3g molecule                                              | 1.92               | 1.19E-02       | 1.39E-01       |
| <b>TOP2A</b>              | DNA topoisomerase II alpha                                 | 1.89               | 1.23E-02       | 1.42E-01       |
| <b>BTLA</b>               | B and T lymphocyte associated                              | 1.88               | 4.15E-03       | 9.24E-02       |
| <b>CXCL10</b>             | C-X-C motif chemokine ligand 10                            | 1.85               | 5.81E-03       | 1.03E-01       |
| <b>PLAUR</b>              | plasminogen activator, urokinase receptor                  | 1.84               | 4.70E-03       | 9.86E-02       |
| <b>CD22</b>               | CD22 molecule                                              | 1.84               | 3.93E-02       | 2.71E-01       |
| <b>TNFRSF13C</b>          | TNF receptor superfamily member 13C                        | 1.81               | 2.80E-03       | 7.73E-02       |
| <b>CCL20</b>              | C-C motif chemokine ligand 20                              | 1.80               | 5.34E-03       | 1.03E-01       |
| <b>IDO1</b>               | indoleamine 2,3-dioxygenase 1                              | 1.78               | 5.38E-03       | 1.03E-01       |
| <b>CD6</b>                | CD6 molecule                                               | 1.78               | 5.98E-03       | 1.04E-01       |
| <b>CD5</b>                | CD5 molecule                                               | 1.77               | 1.04E-02       | 1.37E-01       |
| <b>CXCR3</b>              | C-X-C motif chemokine receptor 3                           | 1.77               | 6.87E-03       | 1.12E-01       |
| <b>UBD</b>                | ubiquitin D                                                | 1.77               | 6.30E-04       | 2.96E-02       |
| <b>TNFRSF18</b>           | TNF receptor superfamily member 18                         | 1.76               | 7.29E-03       | 1.14E-01       |
| <b>CD8A</b>               | CD8a molecule                                              | 1.76               | 2.67E-02       | 2.34E-01       |
| <b>TNFSF15</b>            | TNF superfamily member 15                                  | 1.74               | 1.69E-02       | 1.78E-01       |
| <b>TNFRSF9</b>            | TNF receptor superfamily member 9                          | 1.73               | 1.14E-02       | 1.37E-01       |
| <b>CD80</b>               | CD80 molecule                                              | 1.72               | 1.41E-02       | 1.54E-01       |
| <b>CD2</b>                | CD2 molecule                                               | 1.71               | 7.95E-03       | 1.20E-01       |
| <b>TTK</b>                | TTK protein kinase                                         | 1.70               | 4.46E-03       | 9.62E-02       |
| <b>CD8B</b>               | CD8b molecule                                              | 1.69               | 2.45E-02       | 2.25E-01       |
| <b>CD3E</b>               | CD3e molecule                                              | 1.69               | 1.32E-02       | 1.48E-01       |
| <b>JAK3</b>               | Janus kinase 3                                             | 1.69               | 5.81E-03       | 1.03E-01       |
| <b>LCK</b>                | LCK proto-oncogene, Src family tyrosine kinase             | 1.67               | 1.47E-03       | 4.90E-02       |
| <b>CCL21</b>              | C-C motif chemokine ligand 21                              | 1.66               | 8.72E-05       | 9.22E-03       |
| <b>LAMP3</b>              | lysosomal associated membrane protein 3                    | 1.66               | 3.96E-02       | 2.71E-01       |
| <b>CXCR5</b>              | C-X-C motif chemokine receptor 5                           | 1.66               | 1.76E-04       | 1.30E-02       |
| <b>CARD9</b>              | caspase recruitment domain family member 9                 | 1.66               | 1.74E-02       | 1.78E-01       |
| <b>LTB</b>                | lymphotoxin beta                                           | 1.65               | 9.23E-04       | 3.87E-02       |
| <b>CD1C</b>               | CD1c molecule                                              | 1.64               | 4.18E-03       | 9.24E-02       |
| <b>CCR7</b>               | C-C motif chemokine receptor 7                             | 1.64               | 2.81E-03       | 7.73E-02       |
| <b>EBI3</b>               | Epstein-Barr virus induced 3                               | 1.62               | 3.06E-02       | 2.50E-01       |
| <b>DEFB1</b>              | defensin beta 1                                            | -1.62              | 2.10E-02       | 1.99E-01       |
| <b>IL2RG</b>              | interleukin 2 receptor subunit gamma                       | 1.59               | 1.38E-02       | 1.53E-01       |
| <b>SH2D1A</b>             | SH2 domain containing 1A                                   | 1.59               | 1.08E-02       | 1.37E-01       |
| <b>TREM1</b>              | triggering receptor expressed on myeloid cells 1           | 1.58               | 1.13E-03       | 4.30E-02       |
| <b>CXCL11</b>             | C-X-C motif chemokine ligand 11                            | 1.58               | 1.70E-02       | 1.78E-01       |
| <b>ZAP70</b>              | zeta chain of T-cell receptor associated protein kinase 70 | 1.56               | 3.69E-04       | 2.10E-02       |
| <b>CTSG</b>               | cathepsin G                                                | 1.56               | 1.14E-02       | 1.37E-01       |
| <b>ADORA2A</b>            | adenosine A2a receptor                                     | 1.55               | 2.92E-02       | 2.45E-01       |
| <b>CCL4</b>               | C-C motif chemokine ligand 4                               | 1.53               | 5.53E-03       | 1.03E-01       |
| <b>TARP</b>               | TCR gamma alternate reading frame protein                  | 1.52               | 3.20E-03       | 8.23E-02       |
| <b>CD40LG</b>             | CD40 ligand                                                | 1.52               | 4.71E-02       | 3.01E-01       |
