# Supplementary material
Source: PubMed Central journal article supplement (PMC6279538)
Supplement: NIHMS1504453-supplement-13.pdf [file NIHMS1504453-supplement-13.pdf]

**Supplementary Table 6B: Liver tissue differential gene expression (Nanostring platform)**

| <b>Cluster 1 versus 3</b> |                                                            |                    |                |                |
|---------------------------|------------------------------------------------------------|--------------------|----------------|----------------|
| <b>Gene Symbol</b>        | <b>Gene Name</b>                                           | <b>Fold Change</b> | <b>P-value</b> | <b>Q-value</b> |
| CXCL9                     | C-X-C motif chemokine ligand 9                             | 3.46               | 1.47E-07       | 3.91E-05       |
| CD8A                      | CD8a molecule                                              | 3.29               | 4.52E-06       | 3.37E-04       |
| CD27                      | CD27 molecule                                              | 3.28               | 5.22E-08       | 3.91E-05       |
| CTLA4                     | cytotoxic T-lymphocyte associated protein 4                | 2.93               | 5.14E-07       | 8.69E-05       |
| MMP9                      | matrix metalloproteinase 9                                 | 2.80               | 1.58E-05       | 6.91E-04       |
| CXCR3                     | C-X-C motif chemokine receptor 3                           | 2.68               | 5.59E-06       | 3.72E-04       |
| CD1E                      | CD1e molecule                                              | 2.65               | 1.23E-07       | 3.91E-05       |
| CCL19                     | C-C motif chemokine ligand 19                              | 2.53               | 8.02E-06       | 4.70E-04       |
| SPN                       | sialophorin                                                | 2.44               | 4.99E-05       | 1.66E-03       |
| CCL18                     | C-C motif chemokine ligand 18                              | 2.43               | 1.88E-04       | 3.83E-03       |
| CXCL10                    | C-X-C motif chemokine ligand 10                            | 2.36               | 1.35E-05       | 6.35E-04       |
| CXCL11                    | C-X-C motif chemokine ligand 11                            | 2.31               | 5.45E-07       | 8.69E-05       |
| CD3G                      | CD3g molecule                                              | 2.29               | 2.39E-04       | 4.65E-03       |
| TNFRSF9                   | TNF receptor superfamily member 9                          | 2.25               | 2.97E-06       | 2.63E-04       |
| GZMM                      | granzyme M                                                 | 2.24               | 4.28E-05       | 1.55E-03       |
| MS4A1                     | membrane spanning 4-domains A1                             | 2.21               | 6.11E-04       | 8.93E-03       |
| BIRC5                     | baculoviral IAP repeat containing 5                        | 2.18               | 1.04E-03       | 1.29E-02       |
| CD5                       | CD5 molecule                                               | 2.18               | 3.83E-04       | 6.11E-03       |
| CRP                       | C-reactive protein                                         | -2.16              | 1.19E-02       | 7.21E-02       |
| UBD                       | ubiquitin D                                                | 2.16               | 1.65E-05       | 6.91E-04       |
| IGKC                      | immunoglobulin kappa constant                              | 2.15               | 2.15E-06       | 2.14E-04       |
| IL2RA                     | interleukin 2 receptor subunit alpha                       | 2.07               | 4.24E-03       | 3.45E-02       |
| CD2                       | CD2 molecule                                               | 2.03               | 7.37E-05       | 2.14E-03       |
| LAMP3                     | lysosomal associated membrane protein 3                    | 2.02               | 1.63E-03       | 1.76E-02       |
| CD80                      | CD80 molecule                                              | 2.01               | 7.39E-04       | 1.02E-02       |
| CD6                       | CD6 molecule                                               | 2.00               | 6.27E-04       | 8.93E-03       |
| BTLA                      | B and T lymphocyte associated                              | 2.00               | 2.72E-04       | 4.82E-03       |
| CCL4                      | C-C motif chemokine ligand 4                               | 1.99               | 8.85E-06       | 4.70E-04       |
| CD200                     | CD200 molecule                                             | 1.99               | 4.09E-04       | 6.32E-03       |
| TNFSF15                   | TNF superfamily member 15                                  | 1.97               | 1.16E-03       | 1.35E-02       |
| CLEC4C                    | C-type lectin domain family 4 member C                     | 1.96               | 2.25E-03       | 2.24E-02       |
| LCK                       | LCK proto-oncogene, Src family tyrosine kinase             | 1.96               | 8.47E-06       | 4.70E-04       |
| CD8B                      | CD8b molecule                                              | 1.95               | 7.90E-04       | 1.07E-02       |
| CD22                      | CD22 molecule                                              | 1.94               | 1.84E-02       | 9.77E-02       |
| CARD9                     | caspase recruitment domain family member 9                 | 1.91               | 7.16E-04       | 1.00E-02       |
| ICOS                      | inducible T-cell costimulator                              | 1.91               | 3.27E-05       | 1.24E-03       |
| CCL21                     | C-C motif chemokine ligand 21                              | 1.90               | 1.38E-06       | 1.83E-04       |
| FLT3                      | fms related tyrosine kinase 3                              | 1.89               | 1.03E-03       | 1.29E-02       |
| PTGDS                     | prostaglandin D2 synthase                                  | 1.89               | 5.41E-04       | 8.14E-03       |
| LTB                       | lymphotoxin beta                                           | 1.87               | 5.58E-05       | 1.72E-03       |
| TNFRSF18                  | TNF receptor superfamily member 18                         | 1.86               | 1.61E-04       | 3.38E-03       |
| IDO1                      | indoleamine 2,3-dioxygenase 1                              | 1.86               | 9.82E-05       | 2.33E-03       |
| LAIR2                     | leukocyte associated immunoglobulin like receptor 2        | 1.82               | 1.41E-03       | 1.54E-02       |
| CARD11                    | caspase recruitment domain family member 11                | 1.82               | 1.10E-03       | 1.34E-02       |
| CD28                      | CD28 molecule                                              | 1.81               | 4.65E-06       | 3.37E-04       |
| RUNX3                     | runt related transcription factor 3                        | 1.80               | 9.66E-04       | 1.24E-02       |
| PBK                       | PDZ binding kinase                                         | 1.80               | 6.09E-03       | 4.50E-02       |
| ITK                       | IL2 inducible T-cell kinase                                | 1.79               | 2.09E-03       | 2.17E-02       |
| CD3D                      | CD3d molecule                                              | 1.79               | 1.28E-04       | 2.83E-03       |
| EBI3                      | Epstein-Barr virus induced 3                               | 1.78               | 4.23E-03       | 3.45E-02       |
| TNFRSF13C                 | TNF receptor superfamily member 13C                        | 1.78               | 1.30E-03       | 1.48E-02       |
| NLRC5                     | NLR family CARD domain containing 5                        | 1.77               | 4.50E-05       | 1.56E-03       |
| ZAP70                     | zeta chain of T-cell receptor associated protein kinase 70 | 1.77               | 1.31E-05       | 6.35E-04       |
| CD3E                      | CD3e molecule                                              | 1.76               | 2.34E-03       | 2.28E-02       |
| CCL20                     | C-C motif chemokine ligand 20                              | 1.74               | 4.96E-03       | 3.84E-02       |
| CXCL13                    | C-X-C motif chemokine ligand 13                            | 1.74               | 2.38E-02       | 1.16E-01       |
| TLR10                     | toll like receptor 10                                      | 1.74               | 4.76E-03       | 3.79E-02       |
| SLAMF6                    | SLAM family member 6                                       | 1.73               | 3.80E-03       | 3.19E-02       |
| IL21R                     | interleukin 21 receptor                                    | 1.73               | 9.27E-04       | 1.21E-02       |
| CDK1                      | cyclin dependent kinase 1                                  | 1.72               | 8.72E-03       | 5.84E-02       |
| LY9                       | lymphocyte antigen 9                                       | 1.72               | 2.54E-04       | 4.82E-03       |

**Supplementary Table 6B:** Liver tissue differential gene expression (Nanostring platform; continued)

| <b>Cluster 1 versus 3</b> |                                                            |                    |                |                |
|---------------------------|------------------------------------------------------------|--------------------|----------------|----------------|
| <b>Gene Symbol</b>        | <b>Gene Name</b>                                           | <b>Fold Change</b> | <b>P-value</b> | <b>Q-value</b> |
| <b>TNF</b>                | tumor necrosis factor                                      | 1.72               | 5.01E-03       | 3.84E-02       |
| <b>TARP</b>               | TCR gamma alternate reading frame protein                  | 1.70               | 2.99E-03       | 2.68E-02       |
| <b>CCR7</b>               | C-C motif chemokine receptor 7                             | 1.70               | 8.06E-05       | 2.14E-03       |
| <b>CD19</b>               | CD19 molecule                                              | 1.68               | 3.23E-03       | 2.83E-02       |
| <b>SLAMF7</b>             | SLAM family member 7                                       | 1.68               | 1.14E-03       | 1.35E-02       |
| <b>HLA-DOB</b>            | major histocompatibility complex, class II, DO beta        | 1.68               | 3.32E-03       | 2.88E-02       |
| <b>IRF4</b>               | interferon regulatory factor 4                             | 1.68               | 2.57E-02       | 1.20E-01       |
| <b>ITGA2</b>              | integrin subunit alpha 2                                   | 1.68               | 3.77E-03       | 3.19E-02       |
| <b>NOD2</b>               | nucleotide binding oligomerization domain containing 2     | 1.67               | 9.89E-03       | 6.38E-02       |
| <b>PLAUR</b>              | plasminogen activator, urokinase receptor                  | 1.67               | 1.03E-02       | 6.57E-02       |
| <b>IL7R</b>               | interleukin 7 receptor                                     | 1.67               | 2.33E-03       | 2.28E-02       |
| <b>TOP2A</b>              | DNA topoisomerase II alpha                                 | 1.67               | 1.98E-02       | 1.02E-01       |
| <b>F13A1</b>              | coagulation factor XIII A chain                            | 1.67               | 2.61E-02       | 1.22E-01       |
| <b>CD7</b>                | CD7 molecule                                               | 1.66               | 7.27E-03       | 5.13E-02       |
| <b>CD1C</b>               | CD1c molecule                                              | 1.64               | 2.67E-04       | 4.82E-03       |
| <b>TNFRSF17</b>           | TNF receptor superfamily member 17                         | 1.63               | 1.30E-02       | 7.57E-02       |
| <b>CXCL6</b>              | C-X-C motif chemokine ligand 6                             | 1.62               | 2.01E-02       | 1.03E-01       |
| <b>CD96</b>               | CD96 molecule                                              | 1.59               | 1.16E-03       | 1.35E-02       |
| <b>IL1B</b>               | interleukin 1 beta                                         | 1.59               | 2.40E-02       | 1.16E-01       |
| <b>GZMB</b>               | granzyme B                                                 | 1.58               | 1.28E-02       | 7.57E-02       |
| <b>JAK3</b>               | Janus kinase 3                                             | 1.58               | 2.69E-03       | 2.46E-02       |
| <b>IL2RG</b>              | interleukin 2 receptor subunit gamma                       | 1.57               | 2.69E-04       | 4.82E-03       |
| <b>TLR8</b>               | toll like receptor 8                                       | 1.57               | 2.90E-02       | 1.32E-01       |
| <b>SEMA3D</b>             | semaphorin 3D                                              | 1.56               | 2.70E-02       | 1.24E-01       |
| <b>CD37</b>               | CD37 molecule                                              | 1.56               | 2.65E-02       | 1.23E-01       |
| <b>CD40LG</b>             | CD40 ligand                                                | 1.56               | 1.62E-02       | 8.71E-02       |
| <b>ITGAX</b>              | integrin subunit alpha X                                   | 1.55               | 3.08E-04       | 5.11E-03       |
| <b>CCL13</b>              | C-C motif chemokine ligand 13                              | 1.55               | 1.38E-02       | 7.82E-02       |
| <b>NFATC4</b>             | nuclear factor of activated T-cells 4                      | 1.55               | 1.04E-02       | 6.59E-02       |
| <b>CD48</b>               | CD48 molecule                                              | 1.55               | 2.80E-04       | 4.84E-03       |
| <b>BCL2</b>               | BCL2, apoptosis regulator                                  | 1.55               | 2.44E-05       | 9.72E-04       |
| <b>IKBKE</b>              | inhibitor of nuclear factor kappa B kinase subunit epsilon | 1.55               | 1.07E-02       | 6.70E-02       |
| <b>CXCR5</b>              | C-X-C motif chemokine receptor 5                           | 1.55               | 2.99E-04       | 5.07E-03       |
| <b>TAP1</b>               | transporter 1, ATP binding cassette subfamily B member     | 1.54               | 8.67E-05       | 2.16E-03       |
| <b>BTK</b>                | Bruton tyrosine kinase                                     | 1.53               | 7.95E-05       | 2.14E-03       |
| <b>SH2D1A</b>             | SH2 domain containing 1A                                   | 1.53               | 1.37E-03       | 1.54E-02       |
| <b>CXCR4</b>              | C-X-C motif chemokine receptor 4                           | 1.53               | 2.22E-03       | 2.24E-02       |
| <b>KLRK1</b>              | killer cell lectin like receptor K1                        | 1.52               | 2.00E-03       | 2.10E-02       |
| <b>CD83</b>               | CD83 molecule                                              | 1.52               | 3.64E-03       | 3.12E-02       |
| <b>NCAM1</b>              | neural cell adhesion molecule 1                            | -1.51              | 2.85E-03       | 2.58E-02       |
| <b>IL23R</b>              | interleukin 23 receptor                                    | 1.50               | 8.62E-04       | 1.15E-02       |
| <b>CD79A</b>              | CD79a molecule                                             | 1.50               | 2.22E-03       | 2.24E-02       |
