# Supplementary material
Source: PubMed Central journal article supplement (PMC6279538)
Supplement: NIHMS1504453-supplement-14.pdf [file NIHMS1504453-supplement-14.pdf]

**Supplementary Table 6C:** Liver tissue differential gene expression (Nanostring platform)

| <b>Cluster 2 versus 3</b> |                                  |                    |                |                |
|---------------------------|----------------------------------|--------------------|----------------|----------------|
| <b>Gene Symbol</b>        | <b>Gene Name</b>                 | <b>Fold Change</b> | <b>P-value</b> | <b>Q-value</b> |
| <b>CD8A</b>               | CD8a molecule                    | 1.87               | 6.36E-03       | 6.97E-01       |
| <b>CRP</b>                | C-reactive protein               | -1.81              | 3.45E-02       | 7.57E-01       |
| <b>IGKC</b>               | immunoglobulin kappa constant    | 1.69               | 9.51E-04       | 5.59E-01       |
| <b>FPR2</b>               | formyl peptide receptor 2        | -1.68              | 7.16E-03       | 6.97E-01       |
| <b>CDK1</b>               | cyclin dependent kinase 1        | -1.65              | 1.39E-02       | 6.97E-01       |
| <b>CXCR3</b>              | C-X-C motif chemokine receptor 3 | 1.51               | 3.06E-02       | 7.57E-01       |
| <b>SEMA3D</b>             | semaphorin 3D                    | 1.51               | 1.81E-02       | 7.14E-01       |
