# Supplementary material
Source: PubMed Central journal article supplement (PMC6279538)
Supplement: NIHMS1504453-supplement-15.pdf [file NIHMS1504453-supplement-15.pdf]

**Supplementary Table 7:** Transplantation-related gene sets employed in quantitative set analysis for gene expression

| Gene Set   | Description                                                                                                                                                                                                                                                                |
|------------|----------------------------------------------------------------------------------------------------------------------------------------------------------------------------------------------------------------------------------------------------------------------------|
| QCAT*      | Transcripts associated with cytotoxic T lymphocytes defined in purified cell lines; associated with TCMR in renal transplants with expression levels correlating with T cell infiltration.                                                                                 |
| QCMAT*     | Macrophage associated transcripts defined in purified cell lines, associated with TCMR in kidney patients.                                                                                                                                                                 |
| GRIT1*     | Human orthologs of IFN- $\gamma$ dependent, rejection-associated transcripts defined in mice; expressed in TCMR, especially in association with AMAT1.                                                                                                                     |
| DSAST*     | DSA-positive-specific transcripts derived from comparative analysis of DSA with or without renal biopsies; observed both in ABMR and TCMR with higher levels in ABMR.                                                                                                      |
| AMAT1*     | Alternative Macrophage Associated Transcript 1; human orthologs of mouse data; high GRIT1 plus AMAT1 scores correlate with TCMR.                                                                                                                                           |
| IGT*       | Immunoglobulin associated transcripts, observed both in ABMR and TCMR and associated with allograft fibrosis.                                                                                                                                                              |
| ENDAT*     | Endothelial cell associated transcripts derived from purified cell lines; increased in ABMR and TCMR with higher levels in ABMR.                                                                                                                                           |
| IRRAT*     | Injury-repair response associated with transcripts, defined in early renal transplants with no rejection, derived as a model for acute kidney injury.                                                                                                                      |
| NKB*       | Natural killer cell-specific transcripts derived from purified cells lines; identified in early TCMR and late ABMR in renal patients.                                                                                                                                      |
| TCB*       | T cell-specific transcripts based on purified cell lines.                                                                                                                                                                                                                  |
| BAT*       | B cell-associated transcripts derived from purified B cells; upregulated in both ABMR and TCMR.                                                                                                                                                                            |
| MCAT*      | Mast cell associated transcripts, associated with scarring and poor survival in renal transplants.                                                                                                                                                                         |
| IRITD3*    | Injury and rejection induced transcripts upregulated 3 days after isograft transplant (humanized results from mouse model).                                                                                                                                                |
| IRITD5*    | Same as for IRITD3 but measured on day 5.                                                                                                                                                                                                                                  |
| KT2.1*     | Epithelial solute carriers reduced in day 21 mouse allografts.                                                                                                                                                                                                             |
| KT1*       | Kidney selective transcripts, the majority decreased after injury.                                                                                                                                                                                                         |
| KT1.1*     | Kidney selective transcripts reduced in day 21 mouse allografts                                                                                                                                                                                                            |
| Liver TCMR | Gene signature previously described as being associated with TCMR in stable liver recipients undergoing immunosuppression withdrawal. <b>The 13 genes in this set are: <i>CCL19, SLC1A3, HMMR, GPNMB, CXCL9, GBP2, HLA-DMA, MMP9, MMP7, TOP2A, PLA2G7, FABP5, CD74</i></b> |

\* Pathogenesis-based transcript gene sets from the Alberta Transplant Applied Genomics Centre
