# Supplementary material
Source: PubMed Central journal article supplement (PMC6279538)
Supplement: NIHMS1504453-supplement-16.pdf [file NIHMS1504453-supplement-16.pdf]

**Supplementary Table 8: Gene Set Enrichment Analysis showing the top MSigDB pathways comparing clusters 1, 2, and 3\***

|                                     | <b>PATHWAY</b>                                                          | <b>FDR q-VALUE</b> |
|-------------------------------------|-------------------------------------------------------------------------|--------------------|
| <b>Cluster 1 vs 2</b>               | HALLMARK_ALLOGRAFT_REJECTION                                            | 0.000              |
|                                     | HALLMARK_G2M_CHECKPOINT                                                 | 0.000              |
|                                     | HALLMARK_INTERFERON_GAMMA_RESPONSE                                      | 0.000              |
|                                     | HALLMARK_TNFA_SIGNALING_VIA_NFKB                                        | 0.000              |
|                                     | REACTOME_STRIATED_MUSCLE_CONTRACTION                                    | 0.000              |
|                                     | HALLMARK_MITOTIC_SPINDLE                                                | 0.000              |
|                                     | REACTOME_CHEMOKINE_RECEPTORS_BIND_CHEMOKINES                            | 0.000              |
|                                     | HALLMARK_INFLAMMATORY_RESPONSE                                          | 0.000              |
|                                     | REACTOME_MUSCLE_CONTRACTION                                             | 0.000              |
|                                     | HALLMARK_E2F_TARGETS                                                    | 0.000              |
|                                     | HALLMARK_MYOGENESIS                                                     | 0.000              |
|                                     | REACTOME_REGULATORY_INTERACTIONS_BETWEEN_LYMPHOID_AND_NON_LYMPHOID_CELL | 0.000              |
|                                     | REACTOME_TCR_SIGNALING                                                  | 0.000              |
|                                     | PID_CD8_TCR_PATHWAY                                                     | 0.000              |
|                                     | REACTOME_GENERATION_OF_SECOND_MESSENGER_MOLECULES                       | 0.000              |
|                                     | KEGG_VIRAL_MYOCARDITIS                                                  | 0.000              |
|                                     | KEGG_VIRAL_MYOCARDITIS                                                  | 0.000              |
| BIOCARTA_STATHMIN_PATHWAY           | 0.000                                                                   |                    |
| REACTOME_ADAPTIVE_IMMUNE_SYSTEM     | 0.000                                                                   |                    |
| REACTOME_CELL_CYCLE_MITOTIC         | 0.000                                                                   |                    |
| REACTOME_INTERFERON_GAMMA_SIGNALING | 0.000                                                                   |                    |
| <b>Cluster 1 vs 3</b>               | HALLMARK_EPITHELIAL_MESENCHYMAL_TRANSITION                              | 0.000              |
|                                     | HALLMARK_ALLOGRAFT_REJECTION                                            | 0.000              |
|                                     | PID_INTEGRIN1_PATHWAY                                                   | 0.000              |
|                                     | KEGG_ECM_RECEPTOR_INTERACTION                                           | 0.000              |
|                                     | KEGG_PRIMARY_IMMUNODEFICIENCY                                           | 0.000              |
|                                     | KEGG_HEMATOPOIETIC_CELL_LINEAGE                                         | 0.000              |
|                                     | HALLMARK_INTERFERON_GAMMA_RESPONSE                                      | 0.000              |
|                                     | REACTOME_EXTRACELLULAR_MATRIX_ORGANIZATION                              | 0.000              |
|                                     | REACTOME_GENERATION_OF_SECOND_MESSENGER_MOLECULES                       | 0.000              |
|                                     | HALLMARK_INFLAMMATORY_RESPONSE                                          | 0.000              |
|                                     | KEGG_ALLOGRAFT_REJECTION                                                | 0.000              |
|                                     | REACTOME_REGULATORY_INTERACTIONS_BETWEEN_LYMPHOID_AND_NON_LYMPHOID_CELL | 0.000              |
|                                     | ST_T_CELL_SIGNAL_TRANSDUCTION                                           | 0.000              |
|                                     | PID_SYNDECAN_1_PATHWAY                                                  | 0.000              |
|                                     | KEGG_GRAFT_VERSUS_HOST_DISEASE                                          | 0.000              |
|                                     | NABA_COLLAGENS                                                          | 0.000              |
|                                     | KEGG_VIRAL_MYOCARDITIS                                                  | 0.000              |
| PID_IL12_2PATHWAY                   | 0.000                                                                   |                    |
| PID_CD8_TCR_PATHWAY                 | 0.000                                                                   |                    |
| REACTOME_COLLAGEN_FORMATION         | 0.000                                                                   |                    |
| STELLATE_CELL_PATHWAY *             | 0.002                                                                   |                    |

\* Derived from Zhang DY, et al. Gut. 2016 Oct;65(10):1754-64

**Supplementary Table 8:** Gene Set Enrichment Analysis showing the top MSigDB pathways comparing clusters 1, 2, and 3\* (continued)

|                         | <b>PATHWAY</b>                                            | <b>FDR q-VALUE</b> |
|-------------------------|-----------------------------------------------------------|--------------------|
| <b>Cluster 2 vs 3</b>   | PID_INTEGRIN1_PATHWAY                                     | 0.000              |
|                         | HALLMARK_EPITHELIAL_MESENCHYMAL_TRANSITION                | 0.000              |
|                         | KEGG_ECM_RECEPTOR_INTERACTION                             | 0.006              |
|                         | PID_SYNDECAN_1_PATHWAY                                    | 0.012              |
|                         | REACTOME_COLLAGEN_FORMATION                               | 0.011              |
|                         | NABA_BASEMENT_MEMBRANES                                   | 0.013              |
|                         | NABA_CORE_MATRISOME                                       | 0.013              |
|                         | NABA_COLLAGENS                                            | 0.012              |
|                         | REACTOME_INTEGRIN_CELL_SURFACE_INTERACTIONS               | 0.018              |
|                         | REACTOME_NCAM_SIGNALING_FOR_NEURITE_OUT_GROWTH            | 0.026              |
|                         | REACTOME_NCAM1_INTERACTIONS                               | 0.026              |
|                         | REACTOME_TRANSLOCATION_OF_ZAP_70_TO_IMMUNOLOGICAL_SYNAPSE | 0.026              |
|                         | KEGG_FOCAL_ADHESION                                       | 0.029              |
|                         | REACTOME_PD1_SIGNALING                                    | 0.042              |
|                         | REACTOME_PHOSPHORYLATION_OF_CD3_AND_TCR_ZETA_CHAINS       | 0.053              |
|                         | REACTOME_EXTRACELLULAR_MATRIX_ORGANIZATION                | 0.052              |
|                         | REACTOME_CHOLESTEROL_BIOSYNTHESIS                         | 0.061              |
|                         | BIOCARTA_TCR_ACTIVATION_PATHWAY                           | 0.077              |
|                         | NABA_ECM_GLYCOPROTEINS                                    | 0.078              |
|                         | PID_INTEGRIN1_PATHWAY                                     | 0.000              |
| STELLATE_CELL_PATHWAY * | 0.000                                                     |                    |

\* Derived from Zhang DY, et al. Gut. 2016 Oct;65(10):1754-64
