# Supplementary material
Source: PubMed Central journal article supplement (PMC6279538)
Supplement: NIHMS1504453-supplement-17.pdf [file NIHMS1504453-supplement-17.pdf]

**Supplementary Table 9:** Differences in liver tissue differential gene expression between subjects with and without  $\alpha$ -Class II DSA (Nanostring platform)

| Gene Symbol      | Gene Name                                   | Fold Change | P-value  | Q-value |
|------------------|---------------------------------------------|-------------|----------|---------|
| <b>CCL18</b>     | C-C motif chemokine ligand 18               | 2.23        | 3.04E-05 | 0.008   |
| <b>CXCL9</b>     | C-X-C motif chemokine ligand 9              | 2.17        | 3.46E-05 | 0.008   |
| <b>LAIR2</b>     | leukocyte associated Ig like receptor 2     | 1.86        | 2.86E-05 | 0.008   |
| <b>SLAMF7</b>    | SLAM family member 7                        | 1.74        | 3.77E-05 | 0.008   |
| <b>UBD</b>       | ubiquitin D                                 | 1.68        | 1.04E-04 | 0.017   |
| <b>LTB</b>       | lymphotoxin beta                            | 1.62        | 1.28E-04 | 0.017   |
| <b>CD5</b>       | CD5 molecule                                | 1.85        | 1.74E-04 | 0.020   |
| <b>IGKC</b>      | immunoglobulin kappa constant               | 1.68        | 2.98E-04 | 0.030   |
| <b>IRF4</b>      | interferon regulatory factor 4              | 1.94        | 5.88E-04 | 0.032   |
| <b>CD27</b>      | CD27 molecule                               | 1.85        | 6.18E-04 | 0.032   |
| <b>CD80</b>      | CD80 molecule                               | 1.75        | 6.44E-04 | 0.032   |
| <b>IDO1</b>      | indoleamine 2,3-dioxygenase 1               | 1.62        | 3.96E-04 | 0.032   |
| <b>CD1E</b>      | CD1e molecule                               | 1.63        | 8.01E-04 | 0.034   |
| <b>CXCR3</b>     | C-X-C motif chemokine receptor 3            | 1.77        | 9.03E-04 | 0.036   |
| <b>CD8A</b>      | CD8a molecule                               | 1.96        | 1.16E-03 | 0.040   |
| <b>CXCL11</b>    | C-X-C motif chemokine ligand 11             | 1.56        | 1.13E-03 | 0.040   |
| <b>MMP9</b>      | matrix metalloproteinase 9                  | 1.77        | 1.30E-03 | 0.041   |
| <b>PTGDS</b>     | prostaglandin D2 synthase                   | 1.58        | 1.26E-03 | 0.041   |
| <b>CCL19</b>     | C-C motif chemokine ligand 19               | 1.77        | 1.40E-03 | 0.041   |
| <b>IGHM</b>      | immunoglobulin heavy constant mu            | 1.51        | 1.54E-03 | 0.044   |
| <b>TNFRSF9</b>   | TNF receptor superfamily member 9           | 1.56        | 1.81E-03 | 0.048   |
| <b>CXCL10</b>    | C-X-C motif chemokine ligand 10             | 1.64        | 2.30E-03 | 0.057   |
| <b>TNFRSF11A</b> | TNF receptor superfamily member 11a         | 1.62        | 4.81E-03 | 0.089   |
| <b>SLAMF6</b>    | SLAM family member 6                        | 1.53        | 5.08E-03 | 0.092   |
| <b>CD22</b>      | CD22 molecule                               | 1.85        | 5.83E-03 | 0.099   |
| <b>TNF</b>       | tumor necrosis factor                       | 1.51        | 6.81E-03 | 0.106   |
| <b>SPN</b>       | sialophorin                                 | 1.59        | 8.87E-03 | 0.129   |
| <b>FLT3</b>      | fms related tyrosine kinase 3               | 1.50        | 8.93E-03 | 0.129   |
| <b>CTLA4</b>     | cytotoxic T-lymphocyte associated protein 4 | 1.52        | 1.03E-02 | 0.132   |
| <b>TNFSF15</b>   | TNF superfamily member 15                   | 1.51        | 1.14E-02 | 0.140   |
| <b>MS4A1</b>     | membrane spanning 4-domains A1              | 1.55        | 2.00E-02 | 0.194   |
| <b>CCL13</b>     | C-X-C motif chemokine ligand 13             | 1.54        | 2.32E-02 | 0.210   |
